# Supplementary material
Source: publisher figshare collection journal article supplement (https://acs.figshare.com/ndownloader/files/5199946)
Supplement: Supplementary file 1 [file 5199946]

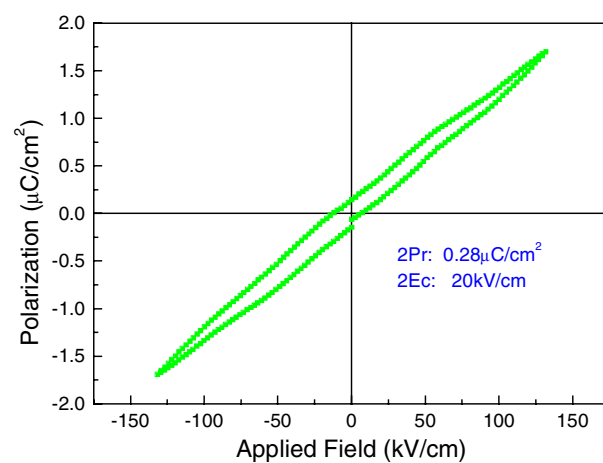

Figure 1S The electric hysteresis loop of **2** was observed by Virtual Ground Mode in a powdered sample in the form of a pellet using an RT6000 ferroelectric tester at room temperature
